# Supplementary material for: Functional Characterization of ShK Domain-Containing Protein in the Plant-Parasitic Nematode <em>Bursaphelenchus xylophilus</em>
Source: Preprints.org preprint supplement (doi:10.20944/preprints202312.0388.v1), 2023-12-06
Supplement: Supplementary file 1 [file supplementary]

## Sheet: Folha1
Table S2: List of primers used in this study for qRT-PCR and validation of the full length transcripts.
Validation the nine candidate genes ShK domain-containing protein with signal peptide, in B. xylophilus genome and transcriptome.
Gene ID	Forward primer	Reverse primer
BXY_0074200	ATGGACCAGTACCTTTTAT	TCAATATAACACATTAAGCAGA
BXY_0192800	CTTGTACTGGCAGTCTTCGTAGT	GGACGATACGCGAGTTCCAC
BXY_0728300	AAAATTGTGACTCTGGCTCTGTTT	GTTATCGCCCTCTTCGTTAC
BXY_0841100	ATGTTTCCAGTCATTCTCTT	ATCACAATCATCCAAACTTTT
BXY_1304100	ATGCTTGTCGCTATGGTTTTG	TTCATCAACCTCATCCCCG
BXY_1328700	TATACTGGCCATGATTGTCTTC	GCCAAGGTTATGCCAAGAATTT
BXY_1389700	TGAATTCGGAATTTGTTGCCTTC	TGGAAGCCGTTGTGGTAGG
BXY_0654300	ATGGAGATGAAGTTCCTGCT	TGTGCAATATCCGCATGTCTT
BXY_1389600	ATGAAGGTTGGGGAATTC	TTATCCTCTCTTCTTCTCCA
In situ hybridization and qPCR of the nine candidate genes ShK domain-containing protein with signal peptide, actin and B. xylophilus catalases.
Gene ID	Forward primer	Reverse primer
BXY_0074200	GCAAGAGTCACGCCTACAAG	CCTTTCTTGATGATCCGCCG
BXY_0192800	CGCTGTAACAATCGGAAGCA	CACCGTCACAGTTTCCACAA
BXY_0728300	TCAGTGGACTTTGCAACAGC	TCGTCAATGGGAGCTTCAGT
BXY_0841100	CGATTTTGCGGAGACCAACA	CACAGGTTTTGGCGCATTTC
BXY_1304100	CCAAGAGACCGAATGCAAGG	CGGTGTTTTCCAAGGACCAG
BXY_1328700	AATGCCAGAACGAACGACTG	CTCGTCGTTGTTGTCGTTGT
BXY_1389700	GCTTCATCGGCAACTAGTGG	TGTAGTTGCCTCAGAACCGT
BXY_0654300	ACCGCAAGTACCACAGATGA	TAGTGGCCGTTTCAGCAGTA
BXY_1389600	GCTGGGCAAAGAAGGGATTC	GGTATTTCGACAGTGGCGTC
BXY_1386500 (Bxy-ctl-1)	GCCAGCGTCTTCAGCAAAGT	CCAAATTCCGTCATCGGTGT
BXY_1745800 (Bxy-ctl-2)	CCGACTTCTTTCAACGGAAC	CCTTCATCGAGCACCTTTTC
Actin	CATCCTCCGTCTCGACTTGG	ATGTCACGCACGATTTCACG
