# Supplementary material for: Functional Characterization of ShK Domain-Containing Protein in the Plant-Parasitic Nematode <em>Bursaphelenchus xylophilus</em>
Source: Preprints.org preprint supplement (doi:10.20944/preprints202312.0388.v1), 2023-12-06
Supplement: Supplementary file 2 [file Supplementary Material_Table S1.xlsx]

## Sheet: Folha1
Table S1: List of NCBI accessions used for multiple sequence alignment and phylogenetics inference.
Organism	Accession
Eucalyptus grandis	KAG7546197
Arabidopsis suecica	XP_010033232
Brugia malayi	VIO92324
Strongyloides ratti	CEF69303
Diploscapter pachys	PAV73547
Meloidogyne incognita	Minc3s00855g18130
Heterodera glycines	Hetgly.G000014452
Toxocara canis	KHN87551
Bursaphelenchus okinawaensis	CAD5214648
Caenorhabditis elegans	CCD70350
